# Supplementary material for: The structure of the human LACTB filament reveals the mechanisms of assembly and membrane binding
Source: PubMed Central journal article supplement (PMC9815587; doi:10.1371/journal.pbio.3001899), 2022-12-19
Supplement: pbio.3001899.s011.pdf [file pbio.3001899.s011.pdf]

**S1 Table | Human LACTB mutations associated with cancer**

| <b>Protein change</b> | <b>Clinical classification</b> | <b>Cancer type</b> |
|-----------------------|--------------------------------|--------------------|
| H116Q                 | Neutral                        | Thyroid carcinoma  |
| E121K                 | Pathogenic                     | Breast             |
| V148F                 | Pathogenic                     | Kidney             |
| E149Q                 | Pathogenic                     | Esophagus          |
| R151S, R151H          | Likely pathogenic              | Uterus             |
| E363K                 | Pathogenic                     | Pancreatic         |
| R371K                 | Pathogenic                     | Lung               |
| A372T                 | Pathogenic                     | Uterus             |
| K380N                 | Pathogenic                     | Cervical           |
| R382L, R382C          | Pathogenic                     | Oral, uterus       |
| E457K                 | Pathogenic                     | Bladder            |
| E468G                 | Pathogenic                     | Glioma             |
| R469K                 | Pathogenic                     | Colon, breast      |
| T472K, T472M          | Neutral                        | Melanoma, colon    |
| R480W, R480Q, R480L   | Pathogenic                     | Lung, colon, liver |
| Y482H                 | Pathogenic                     | Melanoma           |
